# Supplementary material for: What Does It Take to Further Our Knowledge of Plant Diversity in the Megadiverse South Africa?
Source: MDPI journal article supplement (doi:10.3390/d14090748), 2022-09-11
Supplement: s1 [file s1]

Table S1. Time series data on number of species described and number of authors who did the description (1696 – 2019)

| Year | Number_species | Number_authors |
|------|----------------|----------------|
| 1696 | 1              | 1              |
| 1752 | 1              | 1              |
| 1753 | 72             | 7              |
| 1754 | 1              | 1              |
| 1757 | 1              | 1              |
| 1759 | 9              | 2              |
| 1760 | 15             | 3              |
| 1762 | 11             | 2              |
| 1763 | 9              | 2              |
| 1764 | 1              | 1              |
| 1766 | 7              | 2              |
| 1767 | 45             | 8              |
| 1768 | 20             | 3              |
| 1769 | 1              | 1              |
| 1771 | 29             | 9              |
| 1772 | 1              | 1              |
| 1774 | 1              | 1              |
| 1775 | 1              | 1              |
| 1776 | 1              | 1              |
| 1777 | 1              | 1              |
| 1778 | 6              | 1              |
| 1779 | 3              | 1              |
| 1780 | 3              | 1              |
| 1781 | 10             | 2              |
| 1782 | 100            | 5              |
| 1783 | 4              | 2              |
| 1784 | 2              | 1              |
| 1785 | 3              | 1              |
| 1786 | 8              | 3              |
| 1787 | 2              | 1              |
| 1788 | 10             | 4              |
| 1789 | 43             | 8              |
| 1790 | 3              | 1              |
| 1791 | 6              | 2              |
| 1792 | 8              | 3              |
| 1793 | 2              | 1              |
| 1794 | 38             | 11             |

|      |     |    |
|------|-----|----|
| 1795 | 1   | 1  |
| 1796 | 5   | 2  |
| 1797 | 23  | 7  |
| 1798 | 17  | 6  |
| 1799 | 19  | 5  |
| 1800 | 126 | 13 |
| 1801 | 3   | 1  |
| 1802 | 67  | 14 |
| 1803 | 20  | 9  |
| 1804 | 24  | 7  |
| 1805 | 12  | 3  |
| 1806 | 9   | 5  |
| 1807 | 8   | 3  |
| 1808 | 5   | 2  |
| 1809 | 40  | 17 |
| 1810 | 56  | 18 |
| 1811 | 12  | 2  |
| 1812 | 12  | 4  |
| 1813 | 4   | 2  |
| 1814 | 4   | 3  |
| 1815 | 3   | 2  |
| 1816 | 3   | 1  |
| 1816 | 1   | 1  |
| 1817 | 7   | 4  |
| 1818 | 17  | 3  |
| 1819 | 16  | 7  |
| 1820 | 8   | 3  |
| 1821 | 23  | 11 |
| 1822 | 15  | 7  |
| 1823 | 11  | 6  |
| 1824 | 67  | 12 |
| 1825 | 34  | 5  |
| 1826 | 32  | 6  |
| 1827 | 21  | 5  |
| 1828 | 9   | 3  |
| 1829 | 8   | 2  |
| 1830 | 39  | 11 |
| 1831 | 27  | 9  |
| 1832 | 67  | 23 |
| 1833 | 5   | 2  |
| 1834 | 20  | 7  |

|      |     |    |
|------|-----|----|
| 1835 | 16  | 5  |
| 1836 | 213 | 24 |
| 1837 | 69  | 7  |
| 1838 | 200 | 20 |
| 1839 | 89  | 13 |
| 1840 | 31  | 5  |
| 1841 | 64  | 15 |
| 1842 | 11  | 5  |
| 1843 | 41  | 12 |
| 1844 | 22  | 7  |
| 1845 | 16  | 5  |
| 1846 | 26  | 9  |
| 1847 | 12  | 4  |
| 1848 | 32  | 11 |
| 1849 | 5   | 2  |
| 1850 | 15  | 4  |
| 1851 | 5   | 3  |
| 1852 | 9   | 5  |
| 1853 | 2   | 1  |
| 1854 | 9   | 6  |
| 1855 | 3   | 2  |
| 1856 | 41  | 16 |
| 1857 | 52  | 15 |
| 1858 | 9   | 4  |
| 1859 | 5   | 3  |
| 1860 | 100 | 15 |
| 1861 | 5   | 3  |
| 1862 | 75  | 11 |
| 1863 | 6   | 3  |
| 1864 | 3   | 2  |
| 1865 | 69  | 19 |
| 1866 | 11  | 7  |
| 1867 | 3   | 2  |
| 1868 | 20  | 9  |
| 1869 | 4   | 1  |
| 1870 | 10  | 3  |
| 1871 | 6   | 2  |
| 1872 | 2   | 1  |
| 1873 | 6   | 2  |
| 1874 | 5   | 2  |
| 1875 | 11  | 6  |

|      |     |    |
|------|-----|----|
| 1876 | 13  | 4  |
| 1877 | 11  | 7  |
| 1878 | 11  | 3  |
| 1879 | 2   | 2  |
| 1880 | 9   | 7  |
| 1881 | 17  | 14 |
| 1882 | 23  | 9  |
| 1883 | 15  | 6  |
| 1884 | 8   | 5  |
| 1885 | 20  | 16 |
| 1886 | 4   | 3  |
| 1887 | 34  | 21 |
| 1888 | 9   | 3  |
| 1889 | 15  | 12 |
| 1890 | 10  | 3  |
| 1891 | 28  | 13 |
| 1892 | 28  | 11 |
| 1893 | 13  | 9  |
| 1894 | 73  | 21 |
| 1895 | 30  | 9  |
| 1896 | 45  | 17 |
| 1897 | 72  | 15 |
| 1898 | 42  | 11 |
| 1899 | 101 | 26 |
| 1900 | 25  | 7  |
| 1901 | 85  | 13 |
| 1902 | 8   | 4  |
| 1903 | 5   | 3  |
| 1904 | 41  | 9  |
| 1905 | 84  | 10 |
| 1906 | 24  | 7  |
| 1907 | 51  | 13 |
| 1908 | 48  | 15 |
| 1909 | 35  | 9  |
| 1910 | 36  | 7  |
| 1911 | 8   | 4  |
| 1912 | 75  | 17 |
| 1913 | 36  | 12 |
| 1914 | 31  | 11 |
| 1915 | 148 | 17 |
| 1916 | 25  | 9  |

|      |     |    |
|------|-----|----|
| 1917 | 77  | 14 |
| 1918 | 12  | 6  |
| 1919 | 7   | 3  |
| 1920 | 18  | 8  |
| 1921 | 36  | 12 |
| 1922 | 54  | 14 |
| 1923 | 13  | 6  |
| 1924 | 24  | 8  |
| 1925 | 29  | 6  |
| 1926 | 77  | 15 |
| 1927 | 129 | 29 |
| 1928 | 169 | 26 |
| 1929 | 135 | 21 |
| 1930 | 160 | 18 |
| 1931 | 98  | 16 |
| 1932 | 120 | 14 |
| 1933 | 65  | 9  |
| 1934 | 70  | 11 |
| 1935 | 59  | 9  |
| 1936 | 68  | 7  |
| 1937 | 69  | 8  |
| 1938 | 63  | 6  |
| 1939 | 91  | 9  |
| 1940 | 41  | 8  |
| 1941 | 54  | 11 |
| 1942 | 98  | 14 |
| 1943 | 26  | 9  |
| 1944 | 23  | 7  |
| 1945 | 19  | 8  |
| 1946 | 24  | 7  |
| 1947 | 31  | 5  |
| 1948 | 40  | 10 |
| 1949 | 27  | 6  |
| 1950 | 78  | 14 |
| 1951 | 34  | 11 |
| 1952 | 29  | 9  |
| 1953 | 23  | 7  |
| 1954 | 75  | 15 |
| 1955 | 25  | 5  |
| 1956 | 10  | 4  |
| 1957 | 10  | 5  |

|      |     |    |
|------|-----|----|
| 1958 | 53  | 16 |
| 1959 | 65  | 14 |
| 1960 | 44  | 10 |
| 1961 | 41  | 9  |
| 1962 | 59  | 14 |
| 1963 | 94  | 18 |
| 1964 | 38  | 7  |
| 1965 | 29  | 9  |
| 1966 | 42  | 11 |
| 1967 | 64  | 8  |
| 1968 | 77  | 15 |
| 1969 | 51  | 13 |
| 1970 | 22  | 9  |
| 1971 | 42  | 12 |
| 1972 | 160 | 19 |
| 1973 | 99  | 17 |
| 1974 | 48  | 11 |
| 1975 | 113 | 14 |
| 1976 | 60  | 12 |
| 1977 | 55  | 9  |
| 1978 | 104 | 15 |
| 1979 | 59  | 9  |
| 1980 | 36  | 8  |
| 1981 | 93  | 11 |
| 1982 | 74  | 7  |
| 1983 | 97  | 11 |
| 1984 | 113 | 18 |
| 1985 | 168 | 20 |
| 1986 | 168 | 17 |
| 1987 | 63  | 9  |
| 1988 | 80  | 11 |
| 1989 | 201 | 17 |
| 1990 | 110 | 14 |
| 1991 | 110 | 12 |
| 1992 | 97  | 9  |
| 1993 | 93  | 8  |
| 1994 | 107 | 11 |
| 1995 | 134 | 13 |
| 1996 | 113 | 9  |
| 1997 | 96  | 7  |
| 1998 | 295 | 21 |

|      |     |    |
|------|-----|----|
| 1999 | 130 | 12 |
| 2000 | 152 | 17 |
| 2001 | 125 | 15 |
| 2002 | 104 | 16 |
| 2003 | 69  | 13 |
| 2004 | 49  | 10 |
| 2005 | 76  | 11 |
| 2006 | 16  | 6  |
| 2007 | 52  | 8  |
| 2008 | 19  | 4  |
| 2009 | 38  | 19 |
| 2010 | 26  | 16 |
| 2011 | 59  | 15 |
| 2012 | 43  | 18 |
| 2013 | 87  | 23 |
| 2014 | 14  | 8  |
| 2015 | 12  | 10 |
| 2016 | 5   | 5  |
| 2017 | 2   | 3  |
| 2018 | 41  | 18 |
| 2019 | 2   | 2  |
