# Supplementary material for: What Does It Take to Further Our Knowledge of Plant Diversity in the Megadiverse South Africa?
Source: MDPI journal article supplement (doi:10.3390/d14090748), 2022-09-11
Supplement: s1 [file s1]

Table S2: Data collected from Taxonomists through questionnaires

| Gender | Age   | Highest qualification | Current status | Professional status                      | Affiliation                      | Taxonomic specialisation                                                                                 | Biome type                       | Years of experience | Species described         | Unknown species  | Papers Published | Collaborators          | Income                       | Funding                        |
|--------|-------|-----------------------|----------------|------------------------------------------|----------------------------------|----------------------------------------------------------------------------------------------------------|----------------------------------|---------------------|---------------------------|------------------|------------------|------------------------|------------------------------|--------------------------------|
| Female | 50-59 | PhD (Prof)            | Active         | Academic taxonomist (SA)                 | University                       | Legumes, Boraginaecea, caprypholiaceae                                                                   | Savannah, grasslands             | 20                  | rev 6 genera + 30 species | ~2000            | 61               | 3                      | 40 000-5000 and 80 000-90000 | 200 000 a year (past 10 years) |
| Male   | 50-59 | PhD (Prof)            | Active         | Academic taxonomist (SA)                 | University                       | Grasses, daisies, legumes                                                                                | Grasslands, Fynbos               | 25                  | n/a                       | ~200             | 177              | two to three           | n/a                          | 4 million +                    |
| Male   | 60+   | PhD (Prof)            | Active         | Academic taxonomist (SA)                 | University                       | Fabaceae, Apiaceae                                                                                       |                                  | 35                  | 85 new apecies            | ~ 1000           | 449              | none (except students) | 5000-10 000 dollars          | 1,2 million                    |
| Male   | 40-49 | PhD                   | Active         | Academic taxonomist                      | University                       | Oxalidaceae                                                                                              | Forest, Fynbos, Succulent karoo  | 15                  | 13                        | ~ 1000           | 40               | three to four          | 40 000-50000                 | R200 000                       |
| Male   | 50-59 | PhD (Prof)            | Active         | Academic taxonomist                      | University                       | Cyperaceae, Dioscoreaceae, legumes, Rupiaceae                                                            | Fynbos                           | 25                  | 90 species + 3 genera     | Explains in text | 73               | 2-3                    | 10 000-20 000 dollars        | ~ 2 million                    |
| Male   | 50-59 | PhD (Ass. Prof.)      | Active         | Full-time taxonomist (SA)                | Research Institution, University | ASPHODELACEAE, ASTERACEAE , Caryophyllaceae, Colchicaceae, Ranunculaceae, Scrophulariaceae, Thymelaeceae | Fynbos, Succulent karroo         | 30                  | 100                       | relatively a few | 300              | 3                      | 20 000-30000                 | Cant estimate                  |
| Male   | 50-59 | Diploma               | Active         | Academic taxonomist                      | Public Institution               | Ledebouriinae                                                                                            | All biomes except fynbos, forest | 12                  | 5                         | cant say         | 8                | 5                      | 40 000 - 50 000              | nil                            |
| Male   | 50-59 | PhD                   | Active         | Academic taxonomist (In SA but a Non SA) | University                       | Orchidaceae                                                                                              | All biomes                       | 14                  | 10                        | ~2000            | 25               | 5                      | 20 000 - 30 000              | 1 million                      |

|        |       |                  |        |                                    |                                  |                                                                  |                                                |    |    |             |    |   |                 |           |
|--------|-------|------------------|--------|------------------------------------|----------------------------------|------------------------------------------------------------------|------------------------------------------------|----|----|-------------|----|---|-----------------|-----------|
| Male   | 20-29 | Masters          | Active | Full-time taxonomist (SA)          | Research Institution             | Astaraceae, Malvaraceae, Rhamnaceae, Polygalaceae                | Fynbos, Nama Karro, Succulent Karoo            | 7  | 8  | ~ 1 million | 8  | 4 | 20 000-30 000   | ~ 350 000 |
| Male   | 40-49 | PhD (Prof)       | Active | Academic taxonomist                | University                       | Nyctaginaceae, Araceae, Prototulbaghia, Araceae                  | Savannah, grasslands                           | 19 | 8  | ~ 2000      | 20 | 5 | 20 000-30 000   | 5 million |
| Male   | 50-59 | PhD (Prof)       | Active | Academic taxonomist (SA)           | University                       | Colophospermum mopane, Stemonuraceae, Icacinaceae; Pennantiaceae | Savannah                                       | 25 | 6  | ~3000       | 21 | 3 | 5 000- 10 000   | none      |
| Female | 30-39 | PhD              | Active | Academic taxonomist                | University                       | Nyctaginaceae, Aizoaceae, Molluginaceae                          |                                                | 8  | 1  | Many        | 9  | 1 | 20 000-30 000   | 60 000    |
| Female | 30-39 | PhD              | Active | Full-time taxonomist (SA)          | Research Institution, University | Fabaceae, Geraniaceae, Santalaceae                               | Grasslands                                     | 13 | 13 | ~2000       | 23 | 3 | 20 000 - 30 000 | 400 000   |
| Female | 40-49 | PhD              | Active | Full-time taxonomist               | Research Institution, University | Aloes, ferns and lycophytes                                      | All                                            | 11 | 4  | a few 100   | 67 | 4 | 30 000 - 40 000 | 600 000   |
| Female | 30-39 | Masters          | Active | Student, full-time taxonomist (SA) | Research Institution, University | Santalaceae, Iridaceae, Orchidaceae                              | All except (forest, Desert)                    | 2  | 2  | Not sure    | 2  | 4 | 10 000 - 20 000 | 450 000   |
| Male   | 50-59 | Masters          | Active | Academic taxonomist (SA)           | University                       | Hyacinthaceae                                                    | Albany thicket                                 | 25 | 12 | Don't know  | 20 | 2 | 10 000 - 20 000 | nil       |
| Male   | 50-59 | PhD (Ass. Prof.) | Active | Academic taxonomist (SA)           | University                       | Campanulaceae                                                    | Fynbos, Grassland, Nama karoo, Succulent karoo | 20 | 7  | 100         | 24 | 1 | 20 000 - 30 000 | 50 000    |

|        |       |                  |        |                          |            |                                                                                     |                  |    |                      |         |    |        |                 |                            |
|--------|-------|------------------|--------|--------------------------|------------|-------------------------------------------------------------------------------------|------------------|----|----------------------|---------|----|--------|-----------------|----------------------------|
| Female | 60+   | PhD (Ass. Prof.) | Active | Academic taxonomist      | University | Asteraceae, Lamiaceae, Scrophulariaceae, Hyacinthaceae, Hypoxidaceae, Campanulaceae | Grassland        | 30 | 10 + some new genera | no idea | 23 | 2 or 3 | 20 000 - 30 000 | 2 million                  |
| Female | 40-49 | PhD (Ass. Prof.) | Active | Academic taxonomist (SA) | University | Thymelaeacea, Fabacaeae, Phaseoleae                                                 | Savannah, Fynbos | 23 | 15                   | ~ 2000  | 32 | 8      | 50 000 - 60 000 | 120 000 (per year 8 years) |

n
