# Supplementary material for: What Does It Take to Further Our Knowledge of Plant Diversity in the Megadiverse South Africa?
Source: MDPI journal article supplement (doi:10.3390/d14090748), 2022-09-11
Supplement: s1 [file s1]

## Questionnaire

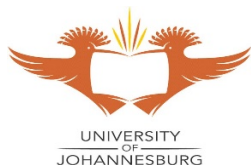

### MSc RESEARCH PROJECT – BOTANY

#### **Botanical efforts for a comprehensive assessment of vascular plant diversity in South Africa**

Email of student doing this research: [patience.mamathaba@gmail.com](mailto:patience.mamathaba@gmail.com)

#### QUESTIONNAIRE

---

#### **Part 1-----Demography of plant taxonomists**

##### 1. Gender

|  |
|--|
|  |
|  |
|  |

##### 2. Age

|       |       |       |       |     |
|-------|-------|-------|-------|-----|
| 20-29 | 30-39 | 40-49 | 50-59 | 60+ |
|-------|-------|-------|-------|-----|

##### 3. Highest academic qualification and/or academic ranks

|         |        |        |         |     |               |       |
|---------|--------|--------|---------|-----|---------------|-------|
| Diploma | Degree | Honors | Masters | PhD | Ass.<br>Prof. | Prof. |
|---------|--------|--------|---------|-----|---------------|-------|

##### 4. Are you an active or a retired taxonomist?

|         |
|---------|
| Active  |
| Retired |

##### 5. Status (multiple choices can be ticked if apply)

|                                                                                                              |  |
|--------------------------------------------------------------------------------------------------------------|--|
| Student taxonomist who has described at least one species                                                    |  |
| Full-time taxonomist (i.e. you work in a research institution doing ONLY taxonomy; e.g. Taxonomist at SANBI) |  |
| Academic taxonomist (You are a taxonomist working in an academic institution, e.g. a University)             |  |
| South African taxonomist based in South Africa (SA) who described at least one SA native species             |  |
| South African taxonomist based outside South Africa (SA) who described at least one SA native species        |  |

|                                                                |  |
|----------------------------------------------------------------|--|
| Non-SA taxonomist who described at least one SA native species |  |
|----------------------------------------------------------------|--|

## 6. Affiliations

|            |                                                  |                     |                    |      |
|------------|--------------------------------------------------|---------------------|--------------------|------|
| University | Research-only Institution, e.g. SANBI, ARC, etc. | Private institution | Public institution | None |
|------------|--------------------------------------------------|---------------------|--------------------|------|

## Part 2-----Taxonomic activities

1. What is your taxonomic specialization: List all taxonomic groups you are working on; e.g. legume, Aizoaceae, etc.

\_\_\_\_\_

2. What SA biome type does your taxonomic work focus on?

|          |                |        |        |        |           |                           |            |                 |
|----------|----------------|--------|--------|--------|-----------|---------------------------|------------|-----------------|
| Savannah | Albany thicket | Desert | forest | fynbos | grassland | Indian Ocean coastal belt | Nama karoo | succulent Karoo |
|----------|----------------|--------|--------|--------|-----------|---------------------------|------------|-----------------|

3. Years of experience as a taxonomist since you described your first species

\_\_\_\_\_

4. How many species have you described during your career?

\_\_\_\_\_

5. Based on your experience, how many species do you think are still missing or unknown in South Africa's flora?

\_\_\_\_\_

6. Publications: How many taxonomic papers have you published during your career? \_\_\_\_\_

7. What is your estimate of the average number of people (collaborators/field assistants, etc.) who contributed to the description of ONE species that you have described (from when the species was spotted to when it was described and published)? \_\_\_\_\_

8. Expenditure for taxonomic activities (**Provide the best rough estimate you can**)

- 8.1. Provide a rough estimate of the average monthly salary received since you have started working as a taxonomist (in SA Rand = US\$0.0065)

|              |               |               |               |               |               |               |               |               |                |          |
|--------------|---------------|---------------|---------------|---------------|---------------|---------------|---------------|---------------|----------------|----------|
| 5,000-10,000 | 10,000-20,000 | 20,000-30,000 | 30,000-40,000 | 40,000-50,000 | 50,000-60,000 | 60,000-70,000 | 70,000-80,000 | 80,000-90,000 | 90,000-100,000 | >100,000 |
|--------------|---------------|---------------|---------------|---------------|---------------|---------------|---------------|---------------|----------------|----------|

- 8.2. Please provide a rough estimate (in Rand or US\$) of the total grants you have secured during your career specifically for taxonomic studies (grants that cover fieldwork, lab-work, equipment and lab maintenance, student bursary, etc.).

---



---

- 8.2.1. If you are non-South African taxonomist but have described at least one species in South Africa, please include in your expenditure estimate, your travel grant (flight, local transport in South Africa, accommodation, food).

---



---

9. Are there any suggestions and comments you have that can assist in the estimate of taxonomic efforts required in South Africa?

---



---



---

10. Do you know of any other taxonomists based in SA or abroad who might have described at least 1 SA native species? If yes, please provide me with his/her email contact.

---



---



---

Thank you!
