# Supplementary material for: What Does It Take to Further Our Knowledge of Plant Diversity in the Megadiverse South Africa?
Source: MDPI journal article supplement (doi:10.3390/d14090748), 2022-09-11
Supplement: s1 [file s1]

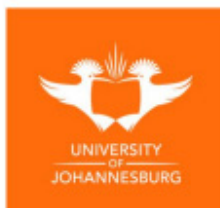

## FACULTY OF SCIENCE

07 April 2020

**STUDENT NUMBER:** 201331496

Ms MP Mamathaba  
297 Sinthumule  
Makhado  
Limpopo  
0921  
[patience.mamathaba@gmail.com](mailto:patience.mamathaba@gmail.com)

Dear Ms Mamathaba

### **MSc in Botany (RD) (M2029Q)**

This serves to inform you that the proposed field of study for the above qualification was approved by the Senate Higher Degrees Committee of the University of Johannesburg on the **4<sup>th</sup> of March 2020**.

#### **The approved field of study is as follows:**

Botanical efforts for a comprehensive assessment of vascular plant diversity in South Africa

**Supervisor** Dr K Yessoufou

**Co-Supervisor** Prof AN Moteetee

Please note the annual final submission dates for graduation in September of the same year or May the following year is 31 May and 31 October respectively.

Sincerely

A handwritten signature in black ink, appearing to be "M Haripersad".

**MRS M HARIPERSAD**  
**FACULTY OFFICER: POSTGRADUATE STUDIES**  
Tel No: 011 559 2459  
Email: [melissah@uj.ac.za](mailto:melissah@uj.ac.za)

**SHDC.120/2020(2)**

---
