# Supplementary material for: What Does It Take to Further Our Knowledge of Plant Diversity in the Megadiverse South Africa?
Source: MDPI journal article supplement (doi:10.3390/d14090748), 2022-09-11
Supplement: s1 [file s1]

Archive with 5 entries (5 files):
- Ethics approval.pdf
- questionnaire.pdf
- R script used for data analysis.pdf
- Table S1.pdf
- Table S2.pdf
